# Supplementary material for: Defining New Research Questions and Protocols in the Field of Traumatic Brain Injury through Public Engagement: Preliminary Results and Review of the Literature
Source: Emerg Med Int. 2019 Oct 31;2019:9101235. doi: 10.1155/2019/9101235 (PMC6875310; doi:10.1155/2019/9101235)
Supplement: Supplementary Materials — Supplementary material 1: pilot survey created to gauge response from head injury patients and their families to establish perceived acceptability to conducting laboratory analysis of neural tissue that may otherwise be discarded, obtaining peripheral blood samples, and for the insertion of jugular bulb catheters in patients with severe traumatic brain injuries. Supplementary material 2: Survey 1 created following feedback from the pilot survey. This contained further details and the response option of “do not know.” This also included new questions regarding obtaining additional tissue, i.e., brain biopsies at the time of insertion of intracranial pressure monitors, and obtaining extra samples of bodily fluids for analysis. Supplementary material 3: Survey 2 created following feedback from Survey 1 to answer questions regarding anonymity, the secure storage of samples in our laboratory, and that no further research investigations would be conducted at follow-up. [file 9101235.f1.zip]

Archive with 3 entries (3 files):
- 9101235.f1/Pilot survey.docx
- 9101235.f1/Survey 1.docx
- 9101235.f1/Survey 2.docx
